# Supplementary material
Source: Springer Nature journal article supplement (https://www.springermedizin.de/resource/supplementary/12960_2013_425_MOESM2_ESM.pdf/9570050)

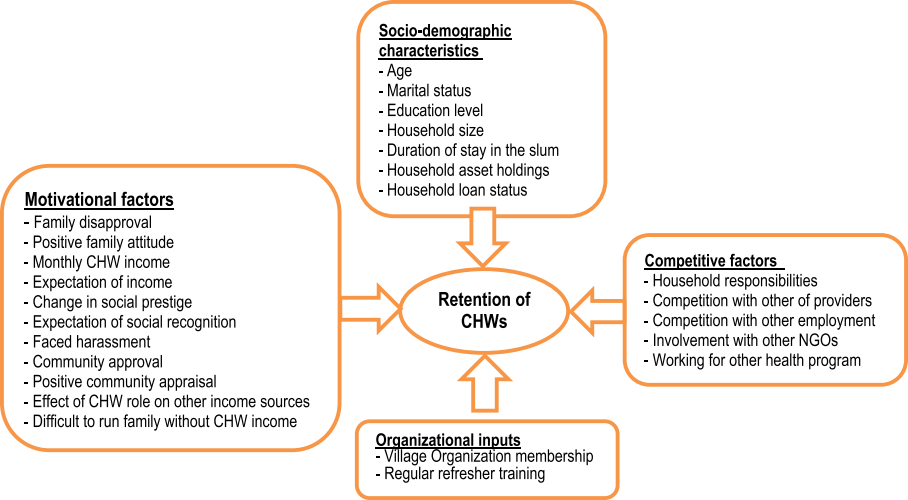

Supplement: MOESM2 [file 9570050]
